# Supplementary material
Source: publisher site journal article supplement (https://www.dovepress.com/article/282698)
Supplement: Supplementary file 1 [file get_supplementary_file.php]

## Supplementary materials

## Supplementary Table S1: HH identification panel

### HH identification panel

This is tool used to identify HHs with cases before the survey is conducted. The following information is prepared to assess all households (HHs) in the respective selected kebeles, mainly to identify the eligible households. If the visited HH fulfilled all the following criteria (i.e. Q#1-4), it is eligible for the survey going to be conducted in the next few days. All the HHs in the respective selected kebele will be given whole numbers sequentially (0001, 0002...). In between if a HH fulfilling all the set criteria is found, give a special labeling code (0001sc, 0002sc...).

| SN | Questions                                                                                                                            | Response        | Skip                                                                                          |
|----|--------------------------------------------------------------------------------------------------------------------------------------|-----------------|-----------------------------------------------------------------------------------------------|
| 1. | Is there any child age less than five years in this HH?                                                                              | 1. Yes<br>2. No | If “No”, give sequential number and go to next HH                                             |
| 2. | If “Yes” to Q#1, is age of the caretaker greater than 15 years old?                                                                  | 1. Yes<br>2. No | If “No”, give sequential number and go to next HH                                             |
| 3. | If “Yes” to Q#2, can the mother/caretaker communicate (listen and respond)                                                           | 1. Yes<br>2. No | If “No”, give sequential number and go to next HH                                             |
| 4. | If “Yes” to Q#3, is any child age less than five years in this HH suffered from at least one of the following in the last two weeks? |                 |                                                                                               |
|    | Fever                                                                                                                                | 1. Yes<br>2. No | <b>If “Yes” to one of the questions, label the HH with respective “special labeling code”</b> |
|    | Cough                                                                                                                                | 1. Yes<br>2. No |                                                                                               |
|    | Diarrhea                                                                                                                             | 1. Yes<br>2. No |                                                                                               |

**Figure S1:** Schematic presentation of the sampling procedure

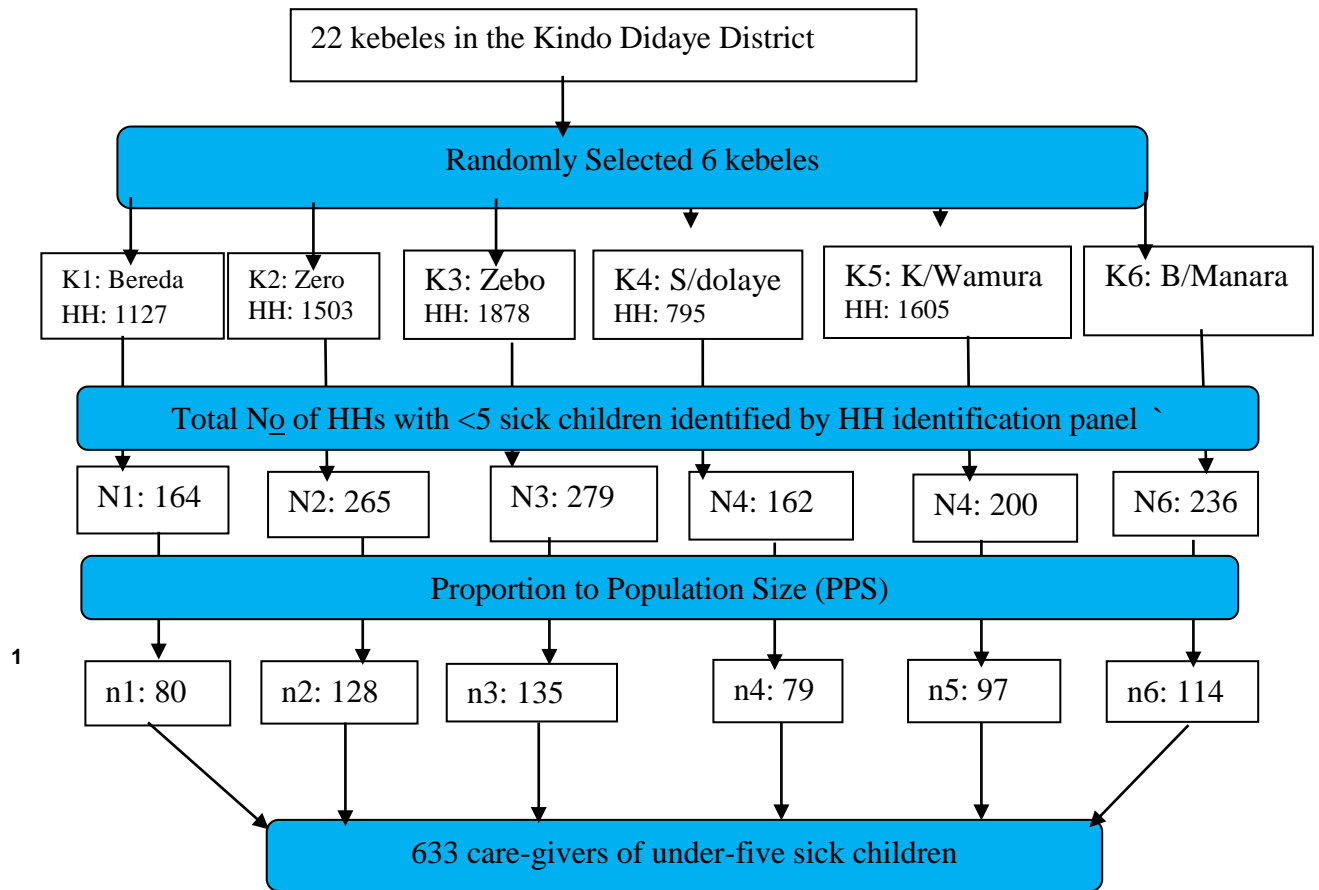

Schematic presentation of the sampling procedure

<sup>1</sup> K=kebele; N=Total number of HH with at least one under-five sick child; n=allocated number of caregivers of under-five sick children; HH=Household
